# Supplementary material for: Multifactorial Programs for Healthy Older Adults to Reduce Falls and Improve Physical Performance: Systematic Review
Source: MDPI journal article supplement (doi:10.3390/ijerph182010842), 2021-10-15
Supplement: s1 [file s1]

**Table S1.** Characteristics of the included studies.

| Study, year and location                                | Studied population, groups, Age (mean), women (%)                                      | Study design                                                                                                                                                                                                                                                                                                                                                                                                                                                                                                                                                                                                                                     | Outcomes                                                                                                                                                                                                                                                                                     | Fall risk factors measures                                                                                                                                                    | Measure time points, dropout and adverse effects                                                                                                                   | Results                                                                                                                                                                                                                                                                                                                                                                                                                                                                                                                                                                                                                                                                                                                                                                                                                                                                                                                                                                                                                                                                                                                                         |
|---------------------------------------------------------|----------------------------------------------------------------------------------------|--------------------------------------------------------------------------------------------------------------------------------------------------------------------------------------------------------------------------------------------------------------------------------------------------------------------------------------------------------------------------------------------------------------------------------------------------------------------------------------------------------------------------------------------------------------------------------------------------------------------------------------------------|----------------------------------------------------------------------------------------------------------------------------------------------------------------------------------------------------------------------------------------------------------------------------------------------|-------------------------------------------------------------------------------------------------------------------------------------------------------------------------------|--------------------------------------------------------------------------------------------------------------------------------------------------------------------|-------------------------------------------------------------------------------------------------------------------------------------------------------------------------------------------------------------------------------------------------------------------------------------------------------------------------------------------------------------------------------------------------------------------------------------------------------------------------------------------------------------------------------------------------------------------------------------------------------------------------------------------------------------------------------------------------------------------------------------------------------------------------------------------------------------------------------------------------------------------------------------------------------------------------------------------------------------------------------------------------------------------------------------------------------------------------------------------------------------------------------------------------|
| Beling and Roller (2009) [33] United States of America. | n= 19.<br>IG= 11 (79.0±6.5 years, 36.4% women).<br>CG=8 (81.0±5.0 years, 50% women).   | Exercise Intervention:<br>- Group activities: 12 weeks; 3 sessions/week; 1h/session; components: center of gravity exercises; balance strategies; stimulation of visual and somatosensory inputs; range of motion and strength exercises).<br>Falls risk home assessment.<br>CG Instructions: No intervention; after intervention CG was invited to a 12-week balance intervention.                                                                                                                                                                                                                                                              | Primary outcomes:<br>- Rate of falls.<br>- Mobility and gait (TUG test, GAIT Rite® system).<br>- Balance (BBS and SOT).<br>- Strength (MMT)                                                                                                                                                  | Cognition (cut off $\geq 24/30$ - MMSE)<br>Functional/Balance (cut off $\geq 13.5$ seconds- Timed Up and Go test)<br>History of falls (2 or more falls in the previous year). | Measurements:<br>- At baseline.<br>- At 3 Months.<br>Dropout:<br>IG (n=1)<br>CG (n=3)<br>Adverse effects:<br>Not mentioned                                         | Rate of falls: significantly lower in the IG compared with CG ( $p \leq 0.05$ ).<br>TUG test, GAIT Rite® system: no significant differences.<br>BBS and SOT: significant between-group differences in BBS ( $p < 0.05$ ), and significant within-group results in SOT ( $p < 0.05$ ).<br>MMT: significant between-group differences in knee extension ( $p \leq 0.05$ ) and significant within-group improvement in the IG regarding dorsiflexion ( $p \leq 0.05$ ).                                                                                                                                                                                                                                                                                                                                                                                                                                                                                                                                                                                                                                                                            |
| Pérula et al. (2012) [34] Spain.                        | n=404<br>IG=133 (76.35±3.9years, 59.4% women)<br>CG=271 (76.5±4.6years, 50.2% women)   | Exercise Intervention:<br>- Group Activities: 1 health education session; physical exercise workshop: flexibility and muscle strength, balance, and gait; 5 sessions; 90 min/session; 3 weeks.<br>- Home-based program: exercises (at least 30 min, 4d/week: flexibility; muscle strength; balance and gait) and walking (at least 30 min/day; 7 times/week).<br>Falls risk home assessment.<br>CG Instructions: brief individual advice; information leaflet about fall prevention and usual clinical care.                                                                                                                                     | Primary outcome:<br>- Rate of falls (FC).<br>- Mobility and gait (POMA-gait).<br>- Balance (POMA-balance).<br>Secondary outcomes:<br>- Fear of falling.<br>- Physical activity level (IPAQ).                                                                                                 | WHO questionnaire (risk factors not available).                                                                                                                               | Measurements:<br>- At baseline.<br>- At 12 Months<br>Falls recorded at 3, 6, 12 months.<br>Dropout:<br>IG (n=12)<br>CG (n=13)<br>Adverse effects:<br>Not mentioned | Rate of falls: when compared to CG, the incidence of falls at home was significantly lower in the IG at 12 months ( $p = 0.040$ ). No significant results in the rate of falls (cumulative incidence) in the 3 follow-up visits.<br>POMA-gait: between-group significant differences ( $p = 0.001$ ).<br>POMA-balance: between-group significant differences ( $p = 0.002$ ).<br>Fear of falling: significant differences ( $p = 0.002$ ).<br>IPAQ: at 12 months (66.2% of the IG increased their PA)                                                                                                                                                                                                                                                                                                                                                                                                                                                                                                                                                                                                                                           |
| Lee et al. (2013) [13] Thailand.                        | n=616<br>IG=313 (75.40±7.2 years, 53.0% women)<br>CG=303 (76.0±7.0 years, 56.1% women) | Exercise Intervention:<br>- Group Activities (supervised training, small groups; 8 weeks; 1 session/ week; 50-60 min/session; components: strength; balance; cardiorespiratory endurance; flexibility).<br>- Home-based program (Frequency: diary; 50-60 min/session; components: strength; balance; cardio-respiratory endurance; flexibility).<br>Falls risk home assessment: Home hazards: evaluation/modification.<br>Health Education: 4 sessions; education brochures.<br>Medical Management: ophthalmologist or other specialist. Medication review.<br>CG Instructions: health education brochures; medication review; medical referral. | Primary outcome:<br>- Rate of falls (PC, DP).<br>- Mobility and gait (TUG test).<br>- Balance (PPA-postural sway).<br>- Strength (PPA-strength).<br>- Physiological functioning (PPA-total score).<br>Secondary outcomes:<br>- Fear of falling (FES-I).<br>- Physical activity level (IPAQ). | PPA (vision, strength, peripheral sensation, ) vestibular function.<br>Participants were classified in low, moderate and marked fall risk levels according to the PPA.        | Measurements:<br>- At baseline.<br>- At 12 Months<br>Dropout:<br>IG (n=34)<br>CG (n=41)<br>Adverse effects:<br>not mentioned                                       | Rate of falls: no differences were observed.<br>TUG test: IG showed significant differences ( $p < 0.001$ ), and compared to CG had a greater improvements ( $p < 0.001$ ).<br>PPA-postural sway: improvements in both IG and CG with open eyes ( $< 0.001$ and $p = 0.002$ respectively) and close eyes ( $p = 0.007$ and $p < 0.001$ respectively). With open eyes, IG had greater significant improvements than CG ( $p = 0.026$ ).<br>PPA-strength: both IG and CG showed significant improvements ( $p = 0.008$ and $p = 0.001$ , respectively). CG had greater significant improvements ( $p = 0.003$ ).<br>PPA-overall index: IG and CG showed significant improvements ( $p < 0.001$ ). Compared to CG, IG had significant improvement ( $p = 0.004$ ).<br>FES-I and IPAQ: IG had only significant within-group improvements ( $p < 0.001$ and $p = 0.002$ , respectively).<br>According to PPA fall risk level: IG participants with marked risk had within and between-group improvements in PPA-postural sway with open eyes ( $p < 0.001$ , $p = 0.006$ ), TUG ( $p < 0.001$ , $p = 0.001$ ) and IPAQ ( $p < 0.01$ , $p = 0.040$ ). |

|                                           |                                                                                            |                                                                                                                                                                                                                                                                                                                                                                                                                                                                                                                                                                                                                                                                                                         |                                                                                                                                                                                                                   |                                                                                                                                                             |                                                                                                                                                                                |                                                                                                                                                                                                                                                                                                                                                                                                                                                                                                                                                            |
|-------------------------------------------|--------------------------------------------------------------------------------------------|---------------------------------------------------------------------------------------------------------------------------------------------------------------------------------------------------------------------------------------------------------------------------------------------------------------------------------------------------------------------------------------------------------------------------------------------------------------------------------------------------------------------------------------------------------------------------------------------------------------------------------------------------------------------------------------------------------|-------------------------------------------------------------------------------------------------------------------------------------------------------------------------------------------------------------------|-------------------------------------------------------------------------------------------------------------------------------------------------------------|--------------------------------------------------------------------------------------------------------------------------------------------------------------------------------|------------------------------------------------------------------------------------------------------------------------------------------------------------------------------------------------------------------------------------------------------------------------------------------------------------------------------------------------------------------------------------------------------------------------------------------------------------------------------------------------------------------------------------------------------------|
| Fairhall et al. (2013) [35]<br>Australia. | n=241<br>IG=120 (83.4±5.8 years, 67.0% women)<br>CG=121 (83.2±5.9 years, 68.0% women)      | Exercise Intervention:<br>- Home-based program (20–30 min/ session; 3 to 5 sessions /week; components: balance; lower limb strength).<br>Falls risk home assessment: home modifications.<br>Medical Management: medication review; management of chronic health conditions.<br>CG: usual care, medical management services and health involvement.                                                                                                                                                                                                                                                                                                                                                      | Primary outcomes:<br>- Rate of falls (FC, PC).<br>- Mobility and gait (SPPB and 4-m walk test),<br>- Balance (PPA-postural sway).<br>- Strength (PPA-strength).<br>- Physiological functioning (PPA-total score). | <b>Cardiovascular Health Study:</b><br>Weight loss;<br>Fatigue;<br>Decreased grip Strength;<br>Slow gait speed;<br>Low physical activity.                   | Measurements:<br>- At baseline<br>- At 3 Months<br>- At 12 Months<br>Dropout:<br>IG (n=13)<br>CG (n=6)<br>Two intervention group participants experienced back pain consistent | At 3 months: no significant between-group differences were described.<br>At 12 months:<br>Rate of falls: no differences were observed when comparing IG and CG.<br>SPPB: compared to CG, IG showed significant better results (p<0.001).<br>4-m walk test: Participants of the IG walked significantly faster (p=0.02).<br>PPA-postural sway: the results of the IG were significantly better results those of the CG (p=0.02).<br>PPA-strength: IG had significantly better performance than CG (p=0.03).<br>PPA-total score: no significant differences. |
| Siegrist et al. (2016) [36]<br>Germany    | n=378<br>IG=222 (78.0 ± 6.0 years, 77.48% women)<br>CG=156 (78 ± 6 .0 years, 72.44% women) | Exercise Intervention:<br>- Group Activities (supervised training; 16 weeks; 1 session /week; 60 min/ session; components: strength; balance; functional training; gait.<br>Health Education: workshop: fall prevention; duration: 3.5 hours.<br>CG: no structured treatment to prevent falls.                                                                                                                                                                                                                                                                                                                                                                                                          | Primary outcomes:<br>- Rate of falls (FC, PC).<br>- Mobility and gait (TUG).<br>- Balance (mRomberg).<br>- Strength (CST).<br>Secondary outcomes:<br>- Fear of falling (FES-I).                                   | History of falls (1 or more falls in the previous year).<br>Physical function- TUG test.<br>Strength- CST.<br>Balance- mRomberg.<br>Fear of falling- FES-I. | Measurements:<br>- At baseline<br>- At 12 Months<br>Dropout:<br>IG (n=38)<br>CG (n=40)<br>No adverse effects were observed                                                     | Rate of falls: significant lower incidence (p=0.007) in the IG.<br>TUG: significant better results in the IG (p=0.014).<br>mRomberg: increased significantly in the IG(p=0.037).<br>CST: no significant differences.<br>FES-I: reduced significantly in the IG (p=0.022).                                                                                                                                                                                                                                                                                  |
| Matchar et al. (2017) [37]<br>Singapore   | n= 354<br>IG=177 (78.2±6.9 years, 75.14% women)<br>CG=177 (74.4±7.2 years, 75.14% women)   | <b>1<sup>st</sup> Active Intervention -3 months</b><br>Exercise Intervention:<br>- Group Activities: exercise program -SAFE; 24 sessions; 1 hour/ session; 2 sessions/week; components: endurance; mobility; balance; integrative mobility training; lower leg strength.<br>- Home-based program:12 sessions; 3 times / week; specifically targets and modifies impairments.<br>Falls risk home assessment: Environmental Hazards - CDC home checklist.<br>Medical management: vision (self-report; Snellen chart and pinhole ocular occlude), polypharmacy (>4).<br><b>2<sup>nd</sup> Maintenance Phase</b><br>CG: Usual care prescribed by a physician and educational materials on falls prevention. | Primary outcomes:<br>- Rate of falls (FC, PC)/ injurious falls.<br>- Mobility and gait (SPPB).                                                                                                                    | SPPB.                                                                                                                                                       | Measurements:<br>- At baseline<br>- At 9 Months<br>Dropout:<br>IG (n=15)<br>CG (n=16)<br>Adverse effects: not mentioned                                                        | Rate of falls: no statistically significant between-group differences at 9 months, but the risk of having at least 1 injurious fall was significantly lower in IG (p=0.041).<br>SPPB: The IG showed significant better results (p=0.029).                                                                                                                                                                                                                                                                                                                  |

BBS= Berg Balance Scale; CDC= Centers for Disease Control and Prevention; CST=Chair-Stand-Test; CG= Control Group; DP= Department visits; FC= Falls Calendar; FES-I= Falls Efficacy Scale-International; IG= Intervention Group; IPAQ= International Physical Activity Questionnaire; MCT= Motor Control Test; MMT= Manual muscle testing; MMSE= Folstein mini-mental state examination; mRomberg: modified Romberg test; PC= Phone Call; POMA= Performance Oriented Mobility Assessment; PPA= Physiological Profile Assessment; ROM= Range of Motion; SAFE= Steps to Avoid Falls in Elderly; SOT= Sensory Organization Test; SPPB= Short Physical Performance Battery; TUG= Timed Up & Go Test; WHO= World Health Organization.
